# Supplementary material for: Gain and loss of elongation factor genes in green algae
Source: PubMed Central journal article supplement (PMC2652445; doi:10.1186/1471-2148-9-39), 2009-02-12
Supplement: 1471-2148-9-39-S1.pdf [file 1471-2148-9-39-S1.pdf]

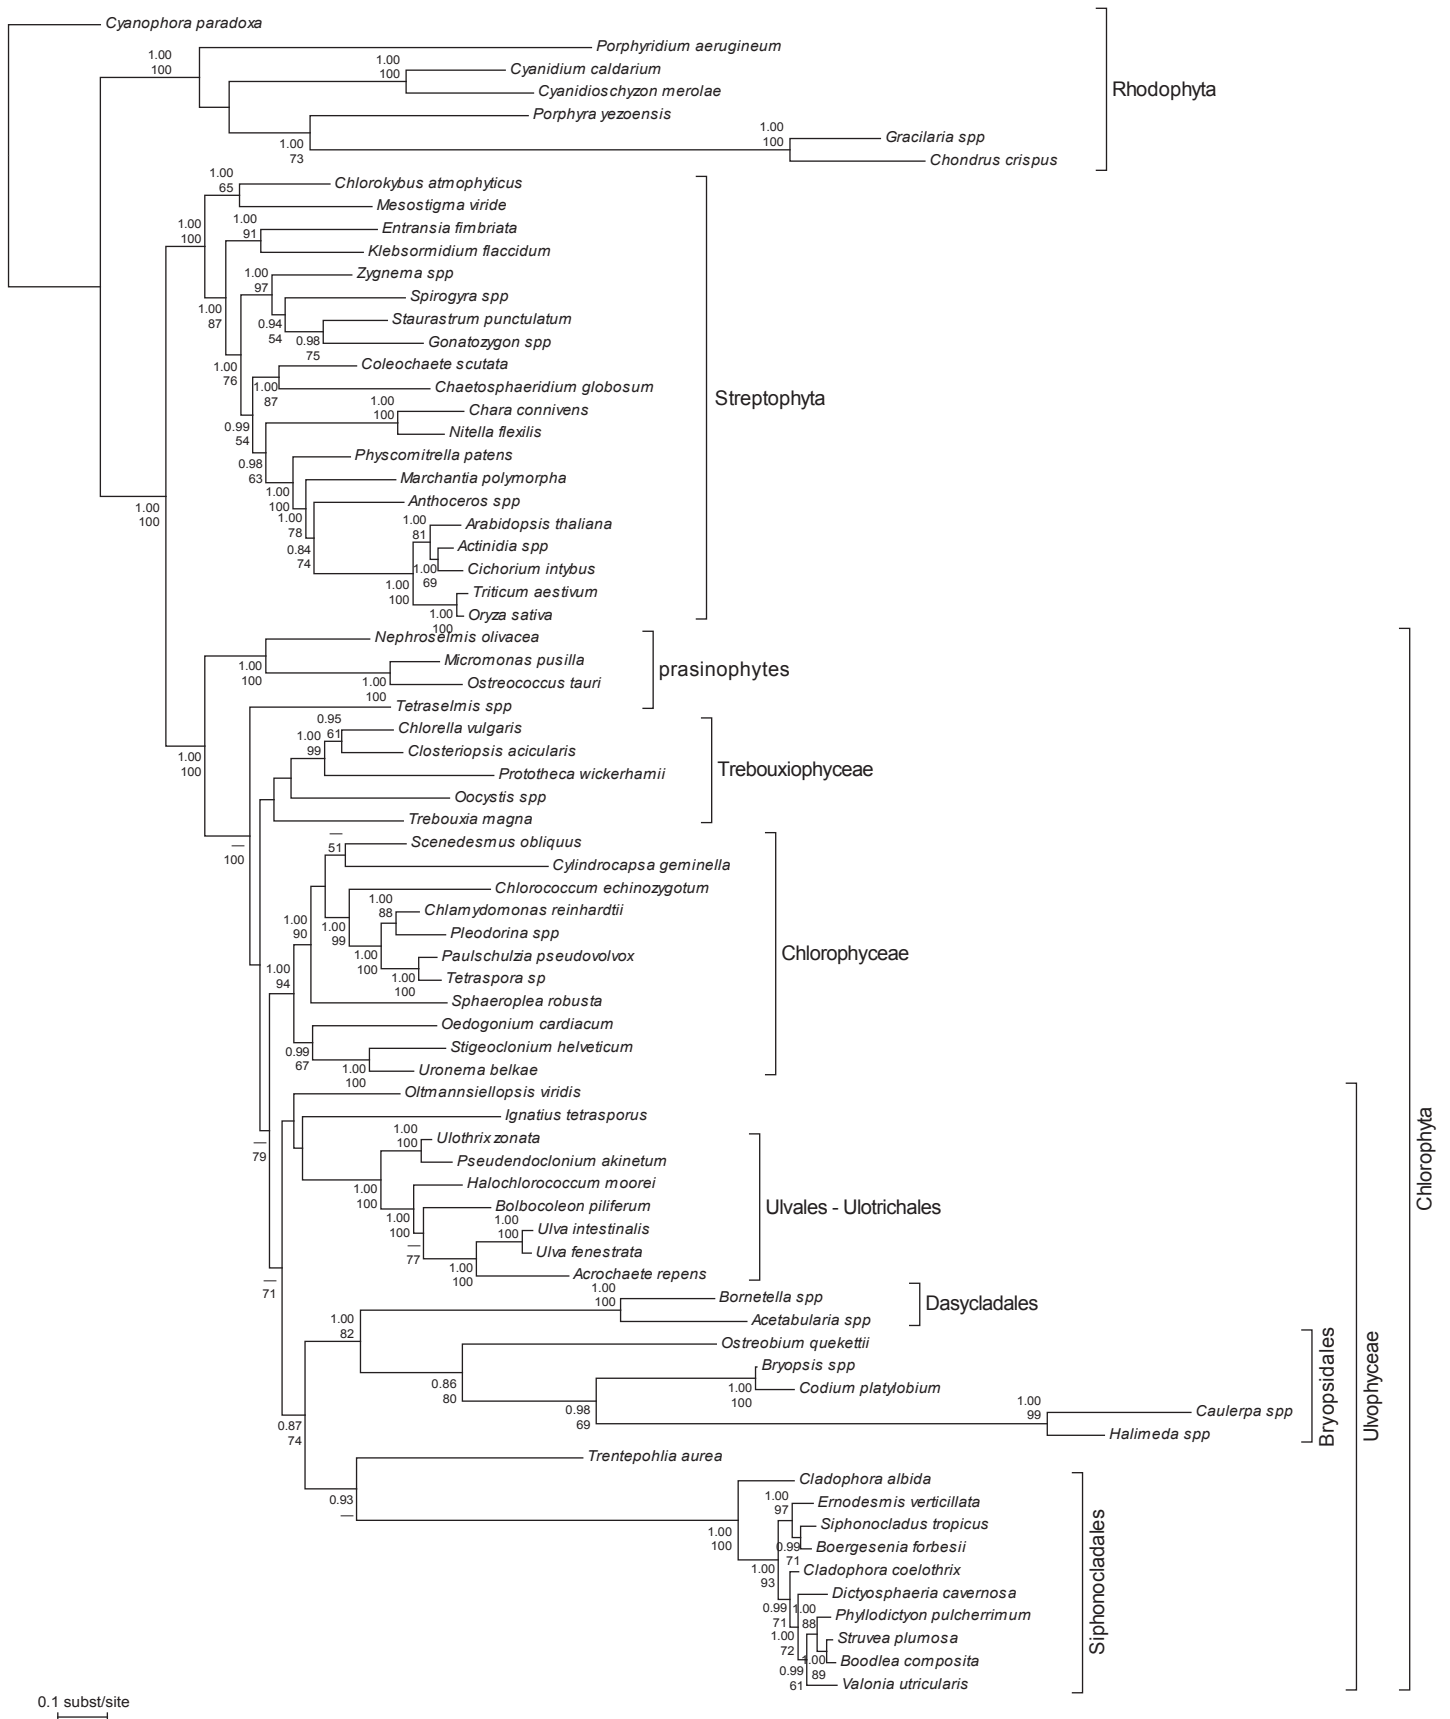

**Figure S1. Reference phylogeny of the green plant lineage obtained by Bayesian inference of nuclear SSU rDNA and the plastid genes *rbcl* and *atpB*. Numbers at nodes indicate posterior probabilities (top) and ML bootstrap values (bottom); values below respectively 0.9 and 50 are not shown.**
