# Supplementary material for: Gain and loss of elongation factor genes in green algae
Source: PubMed Central journal article supplement (PMC2652445; doi:10.1186/1471-2148-9-39), 2009-02-12
Supplement: 1471-2148-9-39-S5.pdf [file 1471-2148-9-39-S5.pdf]

|                                  | number            | Culture collection                                                    |
|----------------------------------|-------------------|-----------------------------------------------------------------------|
| <b>Chlorophyta</b>               |                   |                                                                       |
| <b>Ulvophyceae</b>               |                   |                                                                       |
| <b>Ulvales</b>                   |                   |                                                                       |
| <i>Acrochaete repens</i>         | E093db            | Barbara Rinkel (Natural History Museum, London)                       |
| <i>Bolbocoleon piliferum</i>     | E344pc            | Barbara Rinkel (Natural History Museum, London)                       |
| <i>Ulva fenestrata</i>           | EE2 and EE6       | Field collection at Goese Sas (Netherlands)                           |
| <i>Ulva intestinalis</i>         | EE3               | Field collection at Goese Sas (Netherlands)                           |
| <b>Ignatius-clade</b>            |                   |                                                                       |
| <i>Ignatius tetrasporus</i>      | B 2012            | UTEX culture collection of algae (University of Texas at Austin, USA) |
| <b>Trentepohliales</b>           |                   |                                                                       |
| <i>Trentepohlia aurea</i>        | 483-1             | Sammlung von Algenkulturen (University of Göttingen, Germany)         |
| <b>Bryopsidales</b>              |                   |                                                                       |
| <i>Blastophysa rhizopus</i>      | LB 1029           | UTEX culture collection of algae (University of Texas at Austin, USA) |
| <i>Bryopsis</i> sp.              | EE4               | Field collection at Goese Sas (Netherlands)                           |
| <i>Codium</i> sp                 | HEC 15711         | Field collection in Madeira                                           |
| <i>Derbesia</i> sp.              | 2773-1            | Tatiana Klotchkova (Kongju National University, Korea)                |
| <i>Ostreobium quekettii</i>      | 6.99              | Sammlung von Algenkulturen (University of Göttingen, Germany)         |
| <b>Dasycladales</b>              |                   |                                                                       |
| <i>Acetabularia acetabulum</i>   | LB 2694           | UTEX culture collection of algae (University of Texas at Austin, USA) |
| <i>Bornetella sphaerica</i>      | LB 2690           | UTEX culture collection of algae (University of Texas at Austin, USA) |
| <b>Siphonocladales</b>           |                   |                                                                       |
| <i>Boodlea composita</i>         | Bcomp4, BoTTd75   | Jeanine Olsen and Wytze Stam (University of Groningen, Netherlands)*  |
| <i>Cladophora coelothrix</i>     | Ccoel2, C83.14    | Jeanine Olsen and Wytze Stam (University of Groningen, Netherlands)*  |
| <i>Dictyosphaeria cavernosa</i>  | Dcav3, D.cavSJ25b | Jeanine Olsen and Wytze Stam (University of Groningen, Netherlands)*  |
| <i>Ernodesmis verticillata</i>   | Erno4, EvVGa88    | Jeanine Olsen and Wytze Stam (University of Groningen, Netherlands)*  |
| <i>Phyllocladon orientale</i>    | Struv1, West 1631 | John West (University of Melbourne, Australia)                        |
| <i>Valonia utricularis</i>       | Vutric2, VU1546   | Jeanine Olsen and Wytze Stam (University of Groningen, Netherlands)*  |
| <b>Chlorophyceae</b>             |                   |                                                                       |
| <i>Chlamydomonas reinhardtii</i> | CC1690            | Chlamydomonas Center (Duke University, USA)                           |
| <i>Scenedesmus obliquus</i>      | 1450              | UTEX culture collection of algae (University of Texas at Austin, USA) |
| <b>Trebouxiophyceae</b>          |                   |                                                                       |
| <i>Chlorella kessleri</i>        | 211-11g           | Sammlung von Algenkulturen (University of Göttingen, Germany)         |
| <b>Prasinophyceae</b>            |                   |                                                                       |
| <i>Tetraselmis striata</i>       | 41.85             | Sammlung von Algenkulturen (University of Göttingen, Germany)         |
| <i>Ostreococcus tauri</i>        | OTH95             | Hervé Moreau (Observatoire Océanologique de Banyuls)                  |
| <i>Nephroselmis olivacea</i>     | 40.89             | Sammlung von Algenkulturen (University of Göttingen, Germany)         |
| <b>Streptophyta</b>              |                   |                                                                       |
| <i>Chlorokybus atmophyticus</i>  | 48.80             | Sammlung von Algenkulturen (University of Göttingen, Germany)         |
| <i>Entransia fimbriata</i>       | LB 2793           | UTEX culture collection of algae (University of Texas at Austin, USA) |
| <i>Spirogyra</i> sp.             | 169.80            | Sammlung von Algenkulturen (University of Göttingen, Germany)         |

**Table S1.** Algal strain information.

\*now maintained in the Phycology Research Group, Ghent University
