# Supplementary material for: Gain and loss of elongation factor genes in green algae
Source: PubMed Central journal article supplement (PMC2652445; doi:10.1186/1471-2148-9-39), 2009-02-12
Supplement: 1471-2148-9-39-S6.pdf [file 1471-2148-9-39-S6.pdf]

|                              | <i>atpB</i>                      | <i>rbcL</i>                              | SSU rDNA                                  | EF-1 $\alpha$                                      | EFL                       |
|------------------------------|----------------------------------|------------------------------------------|-------------------------------------------|----------------------------------------------------|---------------------------|
| <b>Chlorophyta</b>           |                                  |                                          |                                           |                                                    |                           |
| <b>Ulvophyceae</b>           |                                  |                                          |                                           |                                                    |                           |
| <b>Ulotrichales</b>          |                                  |                                          |                                           |                                                    |                           |
|                              |                                  |                                          | AY198122                                  |                                                    |                           |
|                              |                                  |                                          | Z47999                                    |                                                    |                           |
| <b>Ulvales</b>               |                                  |                                          |                                           |                                                    |                           |
|                              |                                  | <b>FJ715715</b>                          | <b>FJ715684</b>                           |                                                    | <b>FJ715704</b>           |
|                              |                                  | <b>FJ715716</b>                          | AY205330                                  |                                                    | <b>FJ715705</b>           |
|                              | NC 008114                        | NC 008114                                | DQ011230                                  |                                                    |                           |
|                              |                                  | AF499668                                 |                                           |                                                    | EF551331/ <b>FJ715706</b> |
|                              |                                  | AY422552                                 | AJ000040                                  |                                                    | EF551324/ <b>FJ715707</b> |
| <b>Ignatius-clade</b>        |                                  |                                          |                                           |                                                    |                           |
|                              |                                  |                                          | AB110439                                  | <b>FJ715687</b>                                    |                           |
| <b>Oltmannsiellopsidales</b> |                                  |                                          |                                           |                                                    |                           |
|                              | NC 008099                        | NC 008099                                | D86495                                    |                                                    |                           |
| <b>Bryopsidales</b>          |                                  |                                          |                                           |                                                    |                           |
|                              |                                  |                                          |                                           | <b>FJ715688</b>                                    |                           |
|                              | FJ480417 ( <i>B. plumosa</i> )   | <b>FJ715718</b>                          | <b>FJ715685</b> ( <i>B. plumosa</i> )     | <b>FJ715689</b>                                    |                           |
|                              | FJ480415 ( <i>C. prolifera</i> ) |                                          | AF479703 ( <i>C. sertularioides</i> )     |                                                    |                           |
|                              |                                  |                                          | <b>FJ715686</b> ( <i>C. platylobium</i> ) | <b>FJ715690</b>                                    |                           |
|                              |                                  |                                          |                                           | <b>FJ715691</b>                                    |                           |
|                              | FJ480416 ( <i>H. discoidea</i> ) | <b>FJ715719</b> ( <i>H. incrassate</i> ) | AY786526 ( <i>H. gracilis</i> )           |                                                    |                           |
|                              |                                  | <b>FJ715720</b>                          |                                           | <b>FJ715692</b>                                    |                           |
| <b>Dasycladales</b>          |                                  |                                          |                                           |                                                    |                           |
|                              | FJ480413 ( <i>A. dentata</i> )   | <b>FJ715714</b> ( <i>A. acetabulum</i> ) | Z33461 ( <i>A. acetabulum</i> )           | EF551321/ <b>FJ715693</b> ( <i>A. acetabulum</i> ) |                           |
|                              | FJ480414 ( <i>B. nitida</i> )    | <b>FJ715717</b> ( <i>B. sphearica</i> )  | Z33464 ( <i>B. nitida</i> )               | <b>FJ715694</b> ( <i>B. sphearica</i> )            |                           |
| <b>Siphonocladales</b>       |                                  |                                          |                                           |                                                    |                           |
|                              |                                  |                                          | AM498746                                  |                                                    |                           |
|                              |                                  |                                          | AF510157                                  | <b>FJ715695</b>                                    |                           |
|                              |                                  |                                          | Z35317                                    |                                                    |                           |
|                              |                                  |                                          | Z35315                                    | <b>FJ715696</b>                                    |                           |
|                              |                                  |                                          | AM498756                                  | <b>FJ715697</b>                                    |                           |
|                              |                                  |                                          | AM498757                                  | <b>FJ715698</b>                                    |                           |
|                              |                                  |                                          | AF510163 ( <i>P. pulcherrimum</i> )       | <b>FJ715699</b>                                    |                           |
|                              |                                  |                                          | AM498761                                  |                                                    |                           |
|                              |                                  |                                          | AF510161                                  |                                                    |                           |
|                              |                                  |                                          | Z35323                                    | <b>FJ715700</b>                                    |                           |
| <b>Trentepohliales</b>       |                                  |                                          |                                           |                                                    |                           |
|                              |                                  | <b>FJ715722</b>                          | AB110783                                  |                                                    |                           |
| <b>Chlorophyceae</b>         |                                  |                                          |                                           |                                                    |                           |
|                              |                                  |                                          |                                           |                                                    | DQ122889                  |
|                              | NC 005353                        | NC 005353                                | M32703                                    |                                                    | DS496185/ <b>FJ715708</b> |

|                                   | <i>atpB</i>                         | <i>rbcL</i>                         | SSU rDNA                               | EF-1 $\alpha$             | EFL                                                                         |
|-----------------------------------|-------------------------------------|-------------------------------------|----------------------------------------|---------------------------|-----------------------------------------------------------------------------|
| <i>Chlorococcum echinozygotum</i> | EF113500                            | EF113430                            | U57698                                 |                           | EF551323                                                                    |
| <i>Cylindrocapsa geminella</i>    | EF119849                            | EF113434                            | AF387159                               |                           |                                                                             |
| <i>Oedogonium cardiacum</i>       | EF113523                            | EF113458                            | U83133                                 |                           |                                                                             |
| <i>Paulschulzia pseudovolvox</i>  | AB014040                            | D86837                              | U83120                                 |                           |                                                                             |
| <i>Pleodorina</i> spp             | AB214424 ( <i>P. starrii</i> )      | D86834( <i>P.indica</i> )           |                                        |                           | AB095178 ( <i>P. sp.</i> )                                                  |
| <i>Scenedesmus obliquus</i>       | NC008101                            | NC008101                            | X56103                                 |                           | SOL00000077/ <b>FJ715709</b>                                                |
| <i>Sphaeroplea robusta</i>        | EF113536                            | EF113472                            | U73472                                 |                           |                                                                             |
| <i>Stigeoclonium helveticum</i>   | NC 008372                           | NC 008372                           | U83131                                 |                           |                                                                             |
| <i>Tetraspora</i> sp.             | EF113540                            | EF113477                            | U83121                                 |                           |                                                                             |
| <i>Uronema belkae</i>             | EF113544                            | EF113481                            | AF182821                               |                           |                                                                             |
| <b>Trebouxiophyceae</b>           |                                     |                                     |                                        |                           |                                                                             |
| <i>Chlorella</i> spp              | NC 001865 ( <i>C. vulgaris</i> )    | NC 001865 ( <i>C. vulgaris</i> )    | X13688 ( <i>C. vulgaris</i> )          |                           | <b>FJ715710</b> ( <i>C. kessleri</i> )                                      |
| <i>Closteriopsis acicularis</i>   | EF113502                            | EF113433                            | Y17470                                 |                           |                                                                             |
| <i>Helicosporidium</i> sp.        |                                     |                                     |                                        |                           | AY729488                                                                    |
| <i>Oocystis</i> spp               | EF113524 ( <i>O. apiculata</i> )    | EF113549 ( <i>O. apiculata</i> )    | AF228686 ( <i>O. solitaria</i> )       |                           |                                                                             |
| <i>Prototheca wickerhamii</i>     | AJ245645                            |                                     |                                        |                           | PWL00000297                                                                 |
| <i>Trebouxia magna</i>            | EF113541                            | AJ969630                            | Z21552                                 |                           |                                                                             |
| <b>Prasinophyceae</b>             |                                     |                                     |                                        |                           |                                                                             |
| <b>Chlorodendrales</b>            |                                     |                                     |                                        |                           |                                                                             |
| <i>Tetraselmis</i> spp            | DQ173248 ( <i>T. suecica</i> )      | DQ173247 ( <i>T. suecica</i> )      | X70802 ( <i>T. striata</i> )           |                           | EF551330 ( <i>T. tetraathele</i> )<br><b>FJ715711</b> ( <i>T. striata</i> ) |
| <b>Mamiellales</b>                |                                     |                                     |                                        |                           |                                                                             |
| <i>Micromonas pusilla</i>         |                                     | AY955031                            | AJ010408                               |                           | EF551325                                                                    |
| <i>Ostreococcus lucimarinus</i>   |                                     |                                     |                                        |                           | XM 001420948                                                                |
| <i>Ostreococcus tauri</i>         | NC 008289                           | NC 008289                           | AY329635                               |                           | CR954213/ <b>FJ715713</b>                                                   |
| <b>Pseudosourfieldiales</b>       |                                     |                                     |                                        |                           |                                                                             |
| <i>Nephroselmis olivacea</i>      | NC 00927                            | NC 00927                            | X74754                                 |                           | <b>FJ715712</b>                                                             |
| <b>Streptophyta</b>               |                                     |                                     |                                        |                           |                                                                             |
| <b>Mesostigmatales</b>            |                                     |                                     |                                        |                           |                                                                             |
| <i>Mesostigma viride</i>          | NC 002186                           | NC 002186                           | AJ250109                               |                           | DQ394295                                                                    |
| <b>Chlorokybales</b>              |                                     |                                     |                                        |                           |                                                                             |
| <i>Chlorokybus atmophyticus</i>   | DQ422812                            | DQ422812                            | M95612                                 | <b>FJ715701</b>           |                                                                             |
| <b>Klebsormidiales</b>            |                                     |                                     |                                        |                           |                                                                             |
| <i>Entransia fimbriata</i>        | AY823688                            | E88 slordig                         | LB2793                                 | <b>FJ715702</b>           |                                                                             |
| <i>Klebsormidium flaccidum</i>    | AF408801                            | E87 rbcL2                           | X75520                                 |                           |                                                                             |
| <b>Zygnematales</b>               |                                     |                                     |                                        |                           |                                                                             |
| <i>Gonatozygon</i> spp            | AF408796 ( <i>G. monotaenium</i> )  | U71438 ( <i>G. monotaenium</i> )    | X91346 ( <i>G. aculeatum</i> )         |                           |                                                                             |
| <i>Spirogyra</i> spp              | AF408797 <i>S. maxima</i>           | <b>FJ715721</b> ( <i>S. sp.</i> )   |                                        | EF551328/ <b>FJ715703</b> |                                                                             |
| <i>Staurastrum punctulatum</i>    | NC 008116                           | NC 008116                           | AF115442                               |                           |                                                                             |
| <i>Zygnema</i> spp                | NC 008117 ( <i>Z. circumcarin</i> ) | NC 008117 ( <i>Z. circumcarin</i> ) | AJ853450 ( <i>Z. pseudogedeantum</i> ) |                           |                                                                             |
| <b>Coleochaetales</b>             |                                     |                                     |                                        |                           |                                                                             |
| <i>Chaetosphaeridium globosum</i> | NC 004115                           | NC 004115                           | AF113506                               |                           |                                                                             |

|                                     | <i>atpB</i>                           | <i>rbcL</i>                           | SSU rDNA                       | EF-1 $\alpha$                    | EFL                                                  |
|-------------------------------------|---------------------------------------|---------------------------------------|--------------------------------|----------------------------------|------------------------------------------------------|
| <i>Coleochaete scutata</i>          | AY082303                              | AY082313                              | X68825                         |                                  |                                                      |
| <b>Charales</b>                     |                                       |                                       |                                |                                  |                                                      |
| <i>Chara</i> spp                    | AF408782 ( <i>C. connivens</i> )      | L13476 ( <i>C. connivens</i> )        | U18493 ( <i>C. connivens</i> ) | EF551322 ( <i>C. australis</i> ) |                                                      |
| <i>Nitella flexilis</i>             | AB110837                              | AB076056                              | U05261                         |                                  |                                                      |
| <b>Embryophyta (land plants)</b>    |                                       |                                       |                                |                                  |                                                      |
| <b>Anthocerotophyta (Hornworts)</b> |                                       |                                       |                                |                                  |                                                      |
| <i>Anthoceros</i> spp               | NC 004543 ( <i>A. formosa</i> )       | NC 004543 ( <i>A. formosa</i> )       | X80984 ( <i>A. agrestis</i> )  |                                  |                                                      |
| <b>Marchantiophyta (Liverworts)</b> |                                       |                                       |                                |                                  |                                                      |
| <i>Marchantia polymorpha</i>        | NC 001319                             | NC 001319                             | AB021684                       |                                  |                                                      |
| <b>Bryophyta (Mosses)</b>           |                                       |                                       |                                |                                  |                                                      |
| <i>Physcomitrella patens</i>        | AP005672                              | AB066207                              |                                | XM 001753007                     |                                                      |
| <b>Spermatophyta (Seed plants)</b>  |                                       |                                       |                                |                                  |                                                      |
| <i>Actinidia</i> spp                | AJ235382 ( <i>A. chinensis</i> )      | L01882 ( <i>A. chinensis</i> )        | U42495 ( <i>A. sp.</i> )       | AY946009 ( <i>A. deliciosa</i> ) |                                                      |
| <i>Arabidopsis thaliana</i>         | NC 000932                             | NC 000932                             | AC006837                       | AK230352                         |                                                      |
| <i>Cichorium intybus</i>            |                                       | L13652                                |                                | AY378166                         |                                                      |
| <i>Oryza sativa</i>                 | AC092750                              | AJ746297                              | X00755                         | AF030517                         |                                                      |
| <i>Triticum aestivum</i>            | NC 002762                             | NC 002762                             | AY049040                       | M90077                           |                                                      |
| <i>Vicia faba</i>                   |                                       |                                       |                                | AJ222579                         |                                                      |
| <b>other eukaryotes</b>             |                                       |                                       |                                |                                  |                                                      |
| <b>Archaeplastida</b>               |                                       |                                       |                                |                                  |                                                      |
| <b>Glaucocystophyta</b>             |                                       |                                       |                                |                                  |                                                      |
| <i>Cyanophora paradoxa</i>          | NC 001675                             | NC 001675                             | AY823716                       | AF092951                         |                                                      |
| <b>Rhodophyta</b>                   |                                       |                                       |                                |                                  |                                                      |
| <b>Bangiophyceae</b>                |                                       |                                       |                                |                                  |                                                      |
| <i>Porphyra yezoensis</i>           | AP006715                              |                                       | D79976                         | U08844                           |                                                      |
| <i>Porphyridium aeruginum</i>       |                                       |                                       | AJ421145                       |                                  |                                                      |
| <b>Cyanidiophyceae</b>              |                                       |                                       |                                |                                  |                                                      |
| <i>Cyanidioschyzon merolae</i>      | AB002583                              |                                       | AB158485                       | AB095182                         |                                                      |
| <i>Cyanidium caldarium</i>          | X66698                                |                                       | AB091232                       |                                  |                                                      |
| <b>Florideophyceae</b>              |                                       |                                       |                                |                                  |                                                      |
| <i>Chondrus crispus</i>             |                                       | CCU02984                              | Z14140                         |                                  | CO652990 - CO652099- CO652788                        |
| <i>Gracilaria</i> spp               | AY673996 ( <i>G. tenuistipitata</i> ) | AY673996 ( <i>G. tenuistipitata</i> ) | L26210 ( <i>G. verrucosa</i> ) |                                  | DV963090 - DV963156 - DV964877 ( <i>G. changii</i> ) |
| <b>Chromalveolates</b>              |                                       |                                       |                                |                                  |                                                      |
| <b>Apicomplexans</b>                |                                       |                                       |                                |                                  |                                                      |
| <i>Plasmodium falciparum</i>        |                                       |                                       |                                | X60488                           |                                                      |
| <b>Ciliates</b>                     |                                       |                                       |                                |                                  |                                                      |
| <i>Tetrahymena pyriformis</i>       |                                       |                                       |                                | D11083                           |                                                      |
| <i>Tetrahymena thermophila</i>      |                                       |                                       |                                | XM 001032213                     |                                                      |
| <b>Cryptophytes</b>                 |                                       |                                       |                                |                                  |                                                      |
| <i>Goniomonas amphinema</i>         |                                       |                                       |                                |                                  | AB332031                                             |
| <i>Guillardia theta</i>             |                                       |                                       |                                |                                  | AM183813                                             |

|                          | <i>atpB</i>                        | <i>rbcl</i> | SSU rDNA | EF-1 $\alpha$     | EFL               |
|--------------------------|------------------------------------|-------------|----------|-------------------|-------------------|
| <b>diatoms</b>           | <i>Rhodomonas salina</i>           |             |          |                   | DQ659244          |
|                          | <i>Ditylum brightwellii</i>        |             |          |                   | AB368772          |
|                          | <i>Phaeodactylum tricorutum</i>    |             |          | 18475 (JGI, v2.0) |                   |
|                          | <i>Skeletonema costatum</i>        |             |          |                   | AB368773          |
|                          | <i>Thalassionema nitzschioides</i> |             |          |                   | AB368774          |
|                          | <i>Thalassiosira pseudonana</i>    |             |          | 3858 (JGI, v3.0)  | 41829 (JGI, v3.0) |
| <b>Dinoflagellates</b>   |                                    |             |          |                   |                   |
|                          | <i>Heterocapsa triquetra</i>       |             |          |                   | AY729485          |
|                          | <i>Karlodinium micrum</i>          |             |          |                   | EF134135          |
|                          | <i>Oxyrrhis marina</i>             |             |          |                   | DQ659243          |
| <b>Haptophytes</b>       |                                    |             |          |                   |                   |
|                          | <i>Emiliana huxleyi</i>            |             |          |                   | CV068986          |
|                          | <i>Isochrysis galbana</i>          |             |          |                   | AY729486          |
|                          | <i>Pavlova lutheri</i>             |             |          |                   | AY729487          |
| <b>Heterokonts</b>       |                                    |             |          |                   |                   |
| <b>Oomycetes</b>         |                                    |             |          |                   |                   |
|                          | <i>Phytophthora infestans</i>      |             |          | AJ249839          |                   |
| <b>Opisthokonts</b>      |                                    |             |          |                   |                   |
| <b>Fungi</b>             |                                    |             |          |                   |                   |
|                          | <i>Allomyces macrogynus</i>        |             |          |                   | EC637105          |
|                          | <i>Blastocladiella emersonii</i>   |             |          |                   | EF064246          |
|                          | <i>Mucor racemosus</i>             |             |          | MRATEF1A          |                   |
|                          | <i>Saccharomyces martiniae</i>     |             |          | AF402021          |                   |
| <b>Metazoa (Animals)</b> |                                    |             |          |                   |                   |
|                          | <i>Homo sapiens</i>                |             |          | NM 001958         |                   |
| <b>choanoflagellates</b> |                                    |             |          |                   |                   |
|                          | <i>Monosiga brevicollis</i>        |             |          |                   | XM_001745603      |
|                          | <i>Sphaeroforma arctica</i>        |             |          |                   | DQ403164          |
| <b>Excavates</b>         |                                    |             |          |                   |                   |
| <b>Diplomonads</b>       |                                    |             |          |                   |                   |
|                          | <i>Giardia intestinalis</i>        |             |          | D14342            |                   |
|                          | <i>Giardia lamblia</i>             |             |          | XM 76292          |                   |
| <b>Euglenids</b>         |                                    |             |          |                   |                   |
|                          | <i>Euglena gracilis</i>            |             |          | X16890            |                   |
| <b>Parabasalids</b>      |                                    |             |          |                   |                   |
|                          | <i>Trichomonas tenax</i>           |             |          | D78479            |                   |
|                          | <i>Trichomonas vaginalis</i>       |             |          | XM 001325448      |                   |
| <b>Kinoplastids</b>      |                                    |             |          |                   |                   |
|                          | <i>Leishmania braziliensis</i>     |             |          | XM 001563727      |                   |
| <b>Amoebozoa</b>         |                                    |             |          |                   |                   |
|                          | <i>Entamoeba histolytica</i>       |             |          | ENHEF1ALPH        |                   |

|                                     | <i>atpB</i> | <i>rbcl</i> | SSU rDNA | EF-1 $\alpha$ | EFL      |
|-------------------------------------|-------------|-------------|----------|---------------|----------|
| <b>Rhizaria</b>                     |             |             |          |               |          |
| <b>Cercozoa</b>                     |             |             |          |               |          |
| <i>Bigelowiella natans</i>          |             |             |          |               | AY729489 |
| <b>Foraminifera</b>                 |             |             |          |               |          |
| <i>Planoglabratrella opecularis</i> |             |             |          |               | AB334123 |
| <b>Centrohelids</b>                 |             |             |          |               |          |
| <i>Raphidiophrys contractilis</i>   |             |             |          |               | AB332032 |

**Table S2.** GenBank accession numbers or DOE Joint Genome Institute (JGI) transcript identifiers for nucleotide sequences of *atpB*, *rbcl*, SSU rDNA, EF-1 $\alpha$  and EFL. Newly generated sequences are in boldface. GenBank accession numbers for protein sequences of eRF3 (*Candida maltosa* BAB12681, *Homo sapiens* NP\_002085, *Nicotiana tabacum* AAA79032, *Saccharomyces cerevisiae* EDN60510), HBS1 (*Arabidopsis thaliana* NP\_196625, *Homo sapiens* NP\_006611, *Saccharomyces cerevisiae* NP\_01301) and archaeobacterial EF-1 $\alpha$  (*Sulfolobus sulfataricus* CAA50033, *Termoplasma acidophilum* P19486) are given here between brackets.
